# Supplementary material for: Modern and well integrated techniques for protecting some medicinal plants grown in Hungary.
Source: Oxford University Press journal article supplement (doi:10.1534/genetics.112.145383), 1986-01-01
Supplement: genetics.112.145383-2.pdf [file genetics.112.145383-2.pdf]

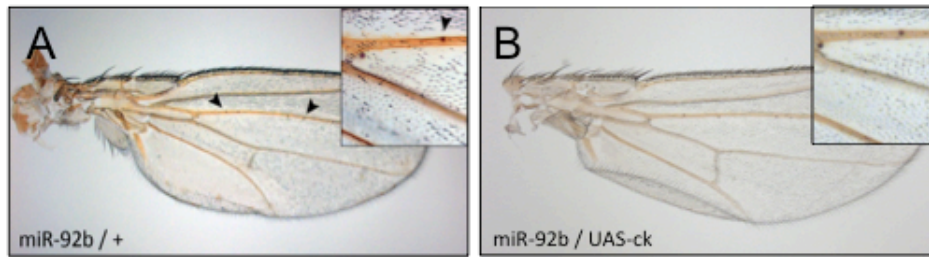

**Figure S2** Co-expression of *UAS-ck* with *miR-92b* does not rescue the wing hair defect (A, B). Expression of *UAS-ck* does not rescue the wing hair defect induced by *miR-92b*. Expression of *UAS-ck* causes no effect in a wt-background or in a *miR-312* background (not shown). Both transgenes are driven by one copy of *MS1096-Gal4*. Both wings derived from adult females.
