# Supplementary material for: Functional Characterization of Drosophila microRNAs by a Novel in Vivo Library
Source: Oxford University Press journal article supplement (doi:10.1534/genetics.112.145383), 2012-10-11
Supplement: genetics.112.145383-4.xls [file genetics.112.145383-4.xls]

## Sheet: Sheet1
miR	mature miR	forward oligo	reverse oligo	ey-Gal4	MS1096-Gal4	description of wing	act5C-Gal4	description of fly
bantam	UGAGAUCAUUUUGAAAGCUGAUU	CTAGCATTTGACTACGAAACCGGTTTTCGATTTGGTTTGACTGTTTTTCATACAAGTGAGATCATTTTGAAAGCTGATTTTGTCAAG	AATTCTTGACAAAATCAGCTTTCAAAATGATCTCACTTGTATGAAAAACAGTCAAACCAAATCGAAAACCGGTTTCGTAGTCAAATG	lethal	lethal		lethal
let-7	UGAGGUAGUAGGUUGUAUAGU	CTAGCTCTGGCAAATTGAGGTAGTAGGTTGTATAGTAGTAATTACACATCATACTATACAATGTGCTAGCTTTCTTTGCTTGAG	AATTCTCAAGCAAAGAAAGCTAGCACATTGTATAGTATGATGTGTAATTACTACTATACAACCTACTACCTCAATTTGCCAGAG	lethal	lethal		lethal
mir-iab-4	CGGUAUACCUUCAGUAUACGUAAC	CTAGCTCGTAAACGTATACTGAATGTATCCTGAGTGTATCCTATCCGGTATACCTTCAGTATACGTAACACGAG	AATTCTCGTGTTACGTATACTGAAGGTATACCGGATAGGATACACTCAGGATACATTCAGTATACGTTTACGAG	no	++/+++	blisters, crumpled, not properly inflated wings	lethal
mir-iab-4as	ACGUAUACUGAAUGUAUCCUGA	CTAGCTCGTGTTACGTATACTGAAGGTATACCGGATAGGATACACTCAGGATACATTCAGTATACGTTTACGAG	AATTCTCGTAAACGTATACTGAATGTATCCTGAGTGTATCCTATCCGGTATACCTTCAGTATACGTAACACGAG	no	no		no
mir-1	UGGAAUGUAAAGAAGUAUGGAG	CTAGCTTCAGCCTTTGAGAGTTCCATGCTTCCTTGCATTCAATAGTTATATTCAAGCATATGGAATGTAAAGAAGTATGGAGCGAAATCTGGCGAGG	AATTCCTCGCCAGATTTCGCTCCATACTTCTTTACATTCCATATGCTTGAATATAACTATTGAATGCAAGGAAGCATGGAACTCTCAAAGGCTGAAG	lethal	lethal		lethal
mir-2a-1	CUCUCAAAGUGGUUGUGAAAUG	CTAGCGCTGGGCTCTCAAAGTGGTTGTGAAATGCATTTCCGCTTTGCGCGGCATATCACAGCCAGCTTTGATGAGCTTAGCG	AATTCGCTAAGCTCATCAAAGCTGGCTGTGATATGCCGCGCAAAGCGGAAATGCATTTCACAACCACTTTGAGAGCCCAGCG	no	no		no
mir-2a-2	CCUCAUCAAGUGGUUGUGAUA	CTAGCATCTAAGCCTCATCAAGTGGTTGTGATATGGATACCCAACGCATATCACAGCCAGCTTTGATGAGCTAGGATG	AATTCATCCTAGCTCATCAAAGCTGGCTGTGATATGCGTTGGGTATCCATATCACAACCACTTGATGAGGCTTAGATG	no	no		no
mir-2b-1	GUCUUCAAAGUGGCAGUGACAUG	CTAGCCTTCAACTGTCTTCAAAGTGGCAGTGACATGTTGTCAACAATATTCATATCACAGCCAGCTTTGAGGAGCGTTGCGGG	AATTCCCGCAACGCTCCTCAAAGCTGGCTGTGATATGAATATTGTTGACAACATGTCACTGCCACTTTGAAGACAGTTGAAGG	no	+	curled wings, vein defect, A cv missing; partial lethality?	lethal
mir-2b-2	UUCUUCAAAGUGGUUGUGAAAUG	CTAGCTTGTGTCATTCTTCAAAGTGGTTGTGAAATGTTTGCCTTTTTATGCCTATTCATATCACAGCCAGCTTTGAGGAGCGACGCGAG	AATTCTCGCGTCGCTCCTCAAAGCTGGCTGTGATATGAATAGGCATAAAAAGGCAAACATTTCACAACCACTTTGAAGAATGACACAAG	no	no/+	very mild curling of wings	lethal
mir-2c	UAUCACAGCCAGCUUUGAUGGGC	CTAGCTCGTATCTTACTTTCAATGTCATCAAAAAGGGCTGAAGAAAGATATTTCTGCATTTGAATCGTATCACAGCCAGCTTTGATGGGCATTGCAATGAGCAGCGAG	AATTCTCGCTGCTCATTGCAATGCCCATCAAAGCTGGCTGTGATACGATTCAAATGCAGAAATATCTTTCTTCAGCCCTTTTTGATGACATTGAAAGTAAGATACGAG	no	no		no
mir-3	UCACUGGGCAAAGUGUGUCUCA	CTAGCGATCCTGGGATGCATCTTGTGCAGTTATGTTTCAATCTCACATCACTGGGCAAAGTGTGTCTCAAGATCG	AATTCGATCTTGAGACACACTTTGCCCAGTGATGTGAGATTGAAACATAACTGCACAAGATGCATCCCAGGATCG	no	no		no
mir-4	AUAAAGCUAGACAACCAUUGA	CTAGCTTGCAATTAGTTTCTTTGGTCGTCCAGCCTTAGGTGATTTTTCCGGTCATAAAGCTAGACAACCATTGAAGTTCGTTGTGGG	AATTCCCACAACGAACTTCAATGGTTGTCTAGCTTTATGACCGGAAAAATCACCTAAGGCTGGACGACCAAAGAAACTAATTGCAAG	no	no		+	slight bristle defect, bristles are slightly wavy & asymmetrical, some ectopic bristles on scutellum
mir-5	AAAGGAACGAUCGUUGUGAUAUG	CTAGCGCTAAAAGGAACGATCGTTGTGATATGAGTTGTTTCCTAACATATCACAGTGATTTTCCTTTATAACGCG	AATTCGCGTTATAAAGGAAAATCACTGTGATATGTTAGGAAACAACTCATATCACAACGATCGTTCCTTTTAGCG	no	no		no
mir-6-1	AGGGAAUAGUUGCUGUGCUGUA	CTAGCTTTAATGTAGAGGGAATAGTTGCTGTGCTGTAAGTTAATATACCATATCTATATCACAGTGGCTGTTCTTTTTGTACCTAAAG	AATTCTTTAGGTACAAAAAGAACAGCCACTGTGATATAGATATGGTATATTAACTTACAGCACAGCAACTATTCCCTCTACATTAAAG	no	no		+	thoracic bristles often short, broken
mir-6-2	AGGGAACUUCUGCUGCUGAUAUA	CTAGCTAACCCAAGGGAACTTCTGCTGCTGATATATTATTGAAAAACTACTATATCACAGTGGCTGTTCTTTTTGGTTGG	AATTCCAACCAAAAAGAACAGCCACTGTGATATAGTAGTTTTTCAATAATATATCAGCAGCAGAAGTTCCCTTGGGTTAG	no	+	slightly curled wings, anocv missing	lethal
mir-6-3	AGGGAACGGUUGCUGAUGAUGUA	CTAGCCAAAAAGAAGGGAACGGTTGCTGATGATGTAGTTTGAAACTCTCACAATTTATATCACAGTGGCTGTTCTTTTTTGTTTGG	AATTCCAAACAAAAAAGAACAGCCACTGTGATATAAATTGTGAGAGTTTCAAACTACATCATCAGCAACCGTTCCCTTCTTTTTGG	no	no		no
mir-7	UGGAAGACUAGUGAUUUUGUUGU	CTAGCGAGTGCATTCCGTATGGAAGACTAGTGATTTTGTTGTTTGGTCTTTGGTAATAACAATAAATCCCTTGTCTTCTTACGGCGTGCATTTG	AATTCAAATGCACGCCGTAAGAAGACAAGGGATTTATTGTTATTACCAAAGACCAAACAACAAAATCACTAGTCTTCCATACGGAATGCACTCG	+++ (male lethal)	+++	PT similar to females, somewhat stronger, wings are smaller	lethal
mir-8	UAAUACUGUCAGGUAAAGAUGUC	CTAGCAAGGACATCTGTTCACATCTTACCGGGCAGCATTAGATCCTTTTTATAACTCTAATACTGTCAGGTAAAGATGTCGTCCGTGTCCTTG	AATTCAAGGACACGGACGACATCTTTACCTGACAGTATTAGAGTTATAAAAAGGATCTAATGCTGCCCGGTAAGATGTGAACAGATGTCCTTG	no	no/+	anterior crossvein missing (in all wings), posterior vein defect (L5 runs parallel to margin posteriorly)	no
mir-9a	UCUUUGGUUAUCUAGCUGUAUGA	CTAGCGCTATGTTGTCTTTGGTTATCTAGCTGTATGAGTGATAAATAACGTCATAAAGCTAGCTTACCGAAGTTAATATTAGCG	AATTCGCTAATATTAACTTCGGTAAGCTAGCTTTATGACGTTATTTATCACTCATACAGCTAGATAACCAAAGACAACATAGCG	no	no		lethal
mir-9b	UCUUUGGUGAUUUUAGCUGUAUG	CTAGCTGCATATTATTTGCTCTTTGGTGATTTTAGCTGTATGGTGTTTATGTATATTCCATAGAGCTTTATTACCAAAAACCAAATGGTTTCTGCAG	AATTCTGCAGAAACCATTTGGTTTTTGGTAATAAAGCTCTATGGAATATACATAAACACCATACAGCTAAAATCACCAAAGAGCAAATAATATGCAG	+	+	ventral bent wings!	lethal
mir-9c	UCUUUGGUAUUCUAGCUGUAGA	CTAGCATTTTTGCTGTTTCTTTGGTATTCTAGCTGTAGATTGTTTCACGCACATTGTATATCATCTAAAGCTTTTATACCAAAGCTCCAGCTTAAATG	AATTCATTTAAGCTGGAGCTTTGGTATAAAAGCTTTAGATGATATACAATGTGCGTGAAACAATCTACAGCTAGAATACCAAAGAAACAGCAAAAATG	+	+		lethal
mir-10	CAAAUUCGGUUCUAGAGAGGUUU	CTAGCCCACGTCTACCCTGTAGATCCGAATTTGTTTTATACTAGCTTTAAGGACAAATTCGGTTCTAGAGAGGTTTGTGTGGG	AATTCCCACACAAACCTCTCTAGAACCGAATTTGTCCTTAAAGCTAGTATAAAACAAATTCGGATCTACAGGGTAGACGTGGG	no	no		no
mir-11	CAUCACAGUCUGAGUUCUUGC	CTAGCGCACTTGTCAAGAACTTTCTCTGTGACCCGCGTGTACTTAAAAGCCGCATCACAGTCTGAGTTCTTGCTGAGTGCG	AATTCGCACTCAGCAAGAACTCAGACTGTGATGCGGCTTTTAAGTACACGCGGGTCACAGAGAAAGTTCTTGACAAGTGCG	no	lethal		lethal
mir-12	UGAGUAUUACAUCAGGUACUGGU	CTAGCTACGGTTGAGTATTACATCAGGTACTGGTGTGCCTTAAATCCAACAACCAGTACTTATGTCATACTACGCCGTGG	AATTCCACGGCGTAGTATGACATAAGTACTGGTTGTTGGATTTAAGGCACACCAGTACCTGATGTAATACTCAACCGTAG	no	+	curly wings	lethal
mir-13a	UAUCACAGCCAUUUUGAUGAGU	CTAGCTACGTAACTCCTCAAAGGGTTGTGAAATGTCGACTATTATCTACTCATATCACAGCCATTTTGATGAGTTTCGTGG	AATTCCACGAAACTCATCAAAATGGCTGTGATATGAGTAGATAATAGTCGACATTTCACAACCCTTTGAGGAGTTACGTAG	no	lethal/+++	app. 60% pharate lethal, curled wings, reduced AP dimensions, quite variable phenotype	lethal
mir-13b-1	UCGUUAAAAUGUUUGUGAACUUAUG	CTAGCCCATGTCGTTAAAATGTTTGTGAACTTATGTATTCACAATCATATCACAGCCATTTTGACGAGTTTGGG	AATTCCCAAACTCGTCAAAATGGCTGTGATATGATTGTGAATACATAAGTTCACAAACATTTTAACGACATGGG	no	no		no
mir-13b-2	GCGUCAAAAUGACUGUGAGCUAUG	CTAGCTATTAACGCGTCAAAATGACTGTGAGCTATGTGGATTTGACTTCATATCACAGCCATTTTGACGAGTTTGG	AATTCCAAACTCGTCAAAATGGCTGTGATATGAAGTCAAATCCACATAGCTCACAGTCATTTTGACGCGTTAATAG	no	no		no
mir-14	UCAGUCUUUUUCUCUCUCCUA	CTAGCTGTGGGAGCGAGACGGGGACTCACTGTGCTTATTAAATAGTCAGTCTTTTTCTCTCTCCTATAG	AATTCTATAGGAGAGAGAAAAAGACTGACTATTTAATAAGCACAGTGAGTCCCCGTCTCGCTCCCACAG	no	+	anterior crossvein missing, smaller, slightly bent wings, distal margin defect	no
mir-31a	UGGCAAGAUGUCGGCAUAGCUGA	CTAGCTCCGTTGGTAAATTGGCAAGATGTCGGCATAGCTGACGTTGAAAAGCGATTTTGAAGAGCGCTATGCTGCATCTAGTCAGTTGTTCAATGGAG	AATTCTCCATTGAACAACTGACTAGATGCAGCATAGCGCTCTTCAAAATCGCTTTTCAACGTCAGCTATGCCGACATCTTGCCAATTTACCAACGGAG	no	no		no
mir-31b	UGGCAAGAUGUCGGAAUAGCUG	CTAGCCAAATAATGAATTTGGCAAGATGTCGGAATAGCTGAGAGCACAGCGGATCGAACATTTTATCGTCCGAAAAAATGTGATTATTTTTGAAAAGCGGCTATGCCTCATCTAGTCAATTGCATTACTTTGG	AATTCCAAAGTAATGCAATTGACTAGATGAGGCATAGCCGCTTTTCAAAAATAATCACATTTTTTCGGACGATAAAATGTTCGATCCGCTGTGCTCTCAGCTATTCCGACATCTTGCCAAATTCATTATTTGG	no	no		no
mir-33	AGGUGCAUUGUAGUCGCAUUG	CTAGCCTCTTCCTCTGGAGATGACACGAAGGTGCATTGTAGTCGCATTGTCTGTCCCAATTGCTTCAGGCAATACAACTTCAGTGCAAGCTCTGTGCATTTCACG	AATTCGTGAAATGCACAGAGCTTGCACTGAAGTTGTATTGCCTGAAGCAATTGGGACAGACAATGCGACTACAATGCACCTTCGTGTCATCTCCAGAGGAAGAGG	no	no		no
mir-34	UGGCAGUGUGGUUAGCUGGUUGUG	CTAGCAATTGGCTATGCGCTTTGGCAGTGTGGTTAGCTGGTTGTGTAGCCAATTATTGCCGTTGACAATTCACAGCCACTATCTTCACTGCCGCCGCGACAAGCG	AATTCGCTTGTCGCGGCGGCAGTGAAGATAGTGGCTGTGAATTGTCAACGGCAATAATTGGCTACACAACCAGCTAACCACACTGCCAAAGCGCATAGCCAATTG	no	no		no
mir-79	UAAAGCUAGAUUACCAAAGCAU	CTAGCTGAAGCTGACTTGCCATTGCTTTGGCGCTTTAGCTGTATGATAGATTTAAACTACTTCATAAAGCTAGATTACCAAAGCATTGGCTTCTGCAGGTCAG	AATTCTGACCTGCAGAAGCCAATGCTTTGGTAATCTAGCTTTATGAAGTAGTTTAAATCTATCATACAGCTAAAGCGCCAAAGCAATGGCAAGTCAGCTTCAG	no	no		no
mir-87	UUGAGCAAAAUUUCAGGUGUG	CTAGCAACACATTTCATTCGCGCCTGTATCTTGCTGAACCGCTGCCATTATGGCCAACGATCCGGTTGAGCAAAATTTCAGGTGTGTGAGAAATGTGTTTAGCAG	AATTCTGCTAAACACATTTCTCACACACCTGAAATTTTGCTCAACCGGATCGTTGGCCATAATGGCAGCGGTTCAGCAAGATACAGGCGCGAATGAAATGTGTTG	no	no		no
mir-92a	CAUUGCACUUGUCCCGGCCUAU	CTAGCAATATGAATTTCCCGTAGGACGGGAAGGTGTCAACGTTTTGCATTTCGAATAAACATTGCACTTGTCCCGGCCTATGGGCGGTTTGTAATAAACAG	AATTCTGTTTATTACAAACCGCCCATAGGCCGGGACAAGTGCAATGTTTATTCGAAATGCAAAACGTTGACACCTTCCCGTCCTACGGGAAATTCATATTG	no	+++	very small wings, highly deformed, curly where phenotype is not so strong	lethal
mir-92b	AAUUGCACUAGUCCCGGCCUGC	CTAGCTAAAACGTCACCTGATGTAGGCCGTGCCCAGTGCTTATTTGTTGCATTTTCGAAATACAAATTGCACTAGTCCCGGCCTGCAATGAGTGTCGCAGTCGACG	AATTCGTCGACTGCGACACTCATTGCAGGCCGGGACTAGTGCAATTTGTATTTCGAAAATGCAACAAATAAGCACTGGGCACGGCCTACATCAGGTGACGTTTTAG	no	+++		lethal
mir-100	AACCCGUAAAUCCGAACUUGUG	CTAGCCCATTAACAGAAACCCGTAAATCCGAACTTGTGCTGTTTTATATCTGTTACAAGACCGGCATTATGGGAGTCTGTCAATGCAAACAACTGGTTTTTGGCAG	AATTCTGCCAAAAACCAGTTGTTTGCATTGACAGACTCCCATAATGCCGGTCTTGTAACAGATATAAAACAGCACAAGTTCGGATTTACGGGTTTCTGTTAATGGG	no	no		no
mir-124	UAAGGCACGCGGUGAAUGCCAAG	CTAGCTCATTTGGTACGTTTTTCTCCTGGTATCCACTGTAGGCCTATATGTATTTCCACCATAAGGCACGCGGTGAATGCCAAGAGCGAACGCAGTTCTACAAATG	AATTCATTTGTAGAACTGCGTTCGCTCTTGGCATTCACCGCGTGCCTTATGGTGGAAATACATATAGGCCTACAGTGGATACCAGGAGAAAAACGTACCAAATGAG	lethal/+++	lethal	lethal (not many pharates found no> pupal/larval lethal?)	lethal
mir-125	UCCCUGAGACCCUAACUUGUGA	CTAGCGACATGTGCAAATGTTTGTATGGCTGATTCCCTGAGACCCTAACTTGTGACTTTTAATACCAGTTTCACAAGTTTTGATCTCCGGTATTGGACGCAAACTTGCTGATGTTG	AATTCAACATCAGCAAGTTTGCGTCCAATACCGGAGATCAAAACTTGTGAAACTGGTATTAAAAGTCACAAGTTAGGGTCTCAGGGAATCAGCCATACAAACATTTGCACATGTCG	no	+	slight vein defect in pnocv and distally (?)	+	additional bristles on scutellum (double-bristles), some 'broken' bristles
mir-133	UUGGUCCCCUUCAACCAGCUGU	CTAGCACCTGCAACACTGTGTGTAGCTGGTTGACATCGGGTCAGATCTGTTTTTCAAGCATTTGGTCCCCTTCAACCAGCTGTAGCCAGTGGTTGATGACAACG	AATTCGTTGTCATCAACCACTGGCTACAGCTGGTTGAAGGGGACCAAATGCTTGAAAAACAGATCTGACCCGATGTCAACCAGCTACACACAGTGTTGCAGGTG	+/++	+	blistered, crumbled, dorsal	lethal
mir-137	UAUUGCUUGAGAAUACACGUAG	CTAGCCAATCTCCAATGGCCACGTGTATGCTCGTAGCTATAACCTGAAATCCAAATGTTATTGCTTGAGAATACACGTAGTTCACCGAGATTTGTTG	AATTCAACAAATCTCGGTGAACTACGTGTATTCTCAAGCAATAACATTTGGATTTCAGGTTATAGCTACGAGCATACACGTGGCCATTGGAGATTGG	no	+	vein defects in distal parts of L3noL5, slight wing margin defects	no
mir-184	UGGACGGAGAACUGAUAAGGGC	CTAGCGGTTGGCCGGTGCATTCGTACCCTTATCATTCTCTCGCCCCGTGTGCACTTAAAGACAACTGGACGGAGAACTGATAAGGGCTCGTATCACCAATTCATCG	AATTCGATGAATTGGTGATACGAGCCCTTATCAGTTCTCCGTCCAGTTGTCTTTAAGTGCACACGGGGCGAGAGAATGATAAGGGTACGAATGCACCGGCCAACCG	+	lethal		lethal
mir-190	AGAUAUGUUUGAUAUUCUUGGUUG	CTAGCCGAACTAATTGATGGTTCCAGTGAGATATGTTTGATATTCTTGGTTGTTTCATTCAAAAGTTCACCCAGGAATCAAACATATTATTACTGTGACCCTCGCG	AATTCGCGAGGGTCACAGTAATAATATGTTTGATTCCTGGGTGAACTTTTGAATGAAACAACCAAGAATATCAAACATATCTCACTGGAACCATCAATTAGTTCGG	++/+++	+	blistered, crumbled, dorsal	lethal
mir-193	UACUGGCCUACUAAGUCCCAAC	CTAGCTGTGTGCCCTTATTATGGTTGGGATTTTTTAGATCAGCAGTTATTGCTATATAGCCATATTTATAAATCTTCTACTGGCCTACTAAGTCCCAACATAATGAGAGTAAAG	AATTCTTTACTCTCATTATGTTGGGACTTAGTAGGCCAGTAGAAGATTTATAAATATGGCTATATAGCAATAACTGCTGATCTAAAAAATCCCAACCATAATAAGGGCACACAG	no	++/+++	heavily deformed wings, only few flies survive	lethal
mir-210	UUGUGCGUGUGACAGCGGCUA	CTAGCAAAGGTGCTTATTGCAGCTGCTGGCCACTGCACAAGATTAGACTTAAGACTCTTGTGCGTGTGACAGCGGCTATTGTAAGAGGCCATAGAAGCAACAGCCG	AATTCGGCTGTTGCTTCTATGGCCTCTTACAATAGCCGCTGTCACACGCACAAGAGTCTTAAGTCTAATCTTGTGCAGTGGCCAGCAGCTGCAATAAGCACCTTTG	no	++/+++	small, curled, heavily deformed, mostly no clear vein pattern	lethal
mir-219	UGAUUGUCCAAACGCAAUUCUUG	CTAGCTAATTCGATTTTTAGCTATGATTGTCCAAACGCAATTCTTGTTGATATTCAATATTCAAGGGTTGCGACTGGGCATCGCGGCTCGAAATAAGAATACAACG	AATTCGTTGTATTCTTATTTCGAGCCGCGATGCCCAGTCGCAACCCTTGAATATTGAATATCAACAAGAATTGCGTTTGGACAATCATAGCTAAAAATCGAATTAG	++	lethal		lethal
mir-252	CUAAGUACUAGUGCCGCAGGAG	CTAGCACCAAGTTCGCTTTCCTAAGTACTAGTGCCGCAGGAGTTAGGTTCGTGTCCGCAATACCTCCTGCTGCCCAAGTGCTTATTAAAGCGGCGAGTG	AATTCACTCGCCGCTTTAATAAGCACTTGGGCAGCAGGAGGTATTGCGGACACGAACCTAACTCCTGCGGCACTAGTACTTAGGAAAGCGAACTTGGTG	lethal/+++	+	blistered, crumbled, dorsal	lethal
mir-263a	GUUAAUGGCACUGGAAGAAUUCAC	CTAGCTAGATCTCGGCACAGTTAATGGCACTGGAAGAATTCACGGGGTAATTTTTATACAACCCGTGATCTCTTAGTGGCATCTATGGTGCGAGAATAAG	AATTCTTATTCTCGCACCATAGATGCCACTAAGAGATCACGGGTTGTATAAAAATTACCCCGTGAATTCTTCCAGTGCCATTAACTGTGCCGAGATCTAG	+	lethal		lethal
mir-263b	CUUGGCACUGGGAGAAUUCAC	CTAGCTTGCTGACTTTGAGTCTTGGCACTGGGAGAATTCACAGTTGACTTTATTATTCTGTGGTTCTGCGGGTGCCAAAACTTAAAAACCGGCTTG	AATTCAAGCCGGTTTTTAAGTTTTGGCACCCGCAGAACCACAGAATAATAAAGTCAACTGTGAATTCTCCCAGTGCCAAGACTCAAAGTCAGCAAG	+	++	wings blistered, crumpled, layers dont adhere properly, vein pattern basically absent	lethal
mir-274	UUUUGUGACCGACACUAACGGGUAAU	CTAGCTCCTGTGTTGCAGTTTCGTTTTGTGACCGACACTAACGGGTAATTGTTTGGCCGCCAGGATTACTCGTTTTTGCGATCACAAATTATGAAATTGCAGCAAG	AATTCTTGCTGCAATTTCATAATTTGTGATCGCAAAAACGAGTAATCCTGGCGGCCAAACAATTACCCGTTAGTGTCGGTCACAAAACGAAACTGCAACACAGGAG	no	no		no
mir-275	UCAGGUACCUGAAGUAGCGCGCG	CTAGCTGTAAAGTCTCCTACCTTGCGCGCTAATCAGTGACCGGGGCTGGTTTTTTATATACAGTCAGGTACCTGAAGTAGCGCGCGTGGTGGCAGACATATATG	AATTCATATATGTCTGCCACCACGCGCGCTACTTCAGGTACCTGACTGTATATAAAAAACCAGCCCCGGTCACTGATTAGCGCGCAAGGTAGGAGACTTTACAG	+	+	anocv always missing, pnocv sometimes (completely), border frail	lethal
mir-276a	UAGGAACUUCAUACCGUGCUCU	CTAGCCCTGGTTTTTGCCATCAGCGAGGTATAGAGTTCCTACGTTCATTATAAACTCGTAGGAACTTCATACCGTGCTCTTGGAAGACCAAAAAACAACCAAGG	AATTCCTTGGTTGTTTTTTGGTCTTCCAAGAGCACGGTATGAAGTTCCTACGAGTTTATAATGAACGTAGGAACTCTATACCTCGCTGATGGCAAAAACCAGGG	+	++	small, blackened wings with blisters	lethal
mir-276b	UAGGAACUUAAUACCGUGCUCU	CTAGCAAAACCGAAGTCTTTTTACCATCAGCGAGGTATAGAGTTCCTACGTTCCTATATTCAGTCGTAGGAACTTAATACCGTGCTCTTGGAGGACTGTCGACCG	AATTCGGTCGACAGTCCTCCAAGAGCACGGTATTAAGTTCCTACGACTGAATATAGGAACGTAGGAACTCTATACCTCGCTGATGGTAAAAAGACTTCGGTTTTG	no	+	blistered, crumbled, dorsal	lethal
mir-277	UAAAUGCACUAUCUGGUACGACA	CTAGCTTGAAGGTTTTGGGCTGCGTGTCAGGAGTGCATTTGCACTGAAACTATCTGAAGCATGTAAATGCACTATCTGGTACGACATTCCAGAACGTACAATCTTG	AATTCAAGATTGTACGTTCTGGAATGTCGTACCAGATAGTGCATTTACATGCTTCAGATAGTTTCAGTGCAAATGCACTCCTGACACGCAGCCCAAAACCTTCAAG	no	no		no
mir-278	UCGGUGGGACUUUCGUCCGUUU	CTAGCGTAATGGTACGGTGCGACCGGATGATGGTTCACAACGACCGTGTCATTTAAACGGGTCGGTGGGACTTTCGTCCGTTTGTAACGCCATTTGTCAACGAG	AATTCTCGTTGACAAATGGCGTTACAAACGGACGAAAGTCCCACCGACCCGTTTAAATGACACGGTCGTTGTGAACCATCATCCGGTCGCACCGTACCATTACG	lethal/+++	pharate lethal		lethal
mir-279	UGACUAGAUCCACACUCAUUAA	CTAGCGGAATTCATACTACTGTTTTTAGTGGGTGGGGGTCCAGTGTTTCACATTGATTTTCTTAGTATTTGTGACTAGATCCACACTCATTAATAACGGTAGTTCG	AATTCGAACTACCGTTATTAATGAGTGTGGATCTAGTCACAAATACTAAGAAAATCAATGTGAAACACTGGACCCCCACCCACTAAAAACAGTAGTATGAATTCCG	no	lethal		lethal
mir-280	UGUAUUUACGUUGCAUAUGAAAUGAUA	CTAGCTGGCTTTTATGTATTTACGTTGCATATGAAATGATATTTATAGTAAACAGATTATTTTATATGCAGGTATATGCAAGTCGAGGTCCTCCACACTGG	AATTCCAGTGTGGAGGACCTCGACTTGCATATACCTGCATATAAAATAATCTGTTTACTATAAATATCATTTCATATGCAACGTAAATACATAAAAGCCAG	no	no		no
mir-281-1	AAGAGAGCUGUCCGUCGACAGU	CTAGCCGAATAAGTGAATAAAGAGAGCTGTCCGTCGACAGTCCAGAAACTATTTAATATCACTGTCATGGAATTGCTCTCTTTGTATAATATTCGG	AATTCCGAATATTATACAAAGAGAGCAATTCCATGACAGTGATATTAAATAGTTTCTGGACTGTCGACGGACAGCTCTCTTTATTCACTTATTCGG	no	no		no
mir-281-2	AAGAGAGCUAUCCGUCGACAGU	CTAGCCGAATTGTGAAATGAAGAGAGCTATCCGTCGACAGTCAAGTTAAGACCGATTGTAATACTGTCATGGAATTGCTCTCTTTGTATAACATTCGG	AATTCCGAATGTTATACAAAGAGAGCAATTCCATGACAGTATTACAATCGGTCTTAACTTGACTGTCGACGGATAGCTCTCTTCATTTCACAATTCGG	no	no		no
mir-282	AAUCUAGCCUCUACUAGGCUUUGUCUGU	CTAGCAGTTTCCTTCTAAATCTAGCCTCTACTAGGCTTTGTCTGTGCATTCGAAAGCCGATCAGACATAGCCTATAAGAGGTTAGGTGTACCAAGGCGAACAG	AATTCTGTTCGCCTTGGTACACCTAACCTCTTATAGGCTATGTCTGATCGGCTTTCGAATGCACAGACAAAGCCTAGTAGAGGCTAGATTTAGAAGGAAACTG	no	no		no
mir-283	UAAAUAUCAGCUGGUAAUUCU	CTAGCCTCACACGATTCTCAAAGGTAAATATCAGCTGGTAATTCTGGGAGCTAAGCCTAAATATGAAACACTCGGAATTTCAGTTGGTATCGACTTTTTTGAATTG	AATTCAATTCAAAAAAGTCGATACCAACTGAAATTCCGAGTGTTTCATATTTAGGCTTAGCTCCCAGAATTACCAGCTGATATTTACCTTTGAGAATCGTGTGAGG	no	no		no
mir-284	UGAAGUCAGCAACUUGAUUCCAGCAAUUG	CTAGCGTTGCAGTTCCTGGAATTAAGTTGACTGTGTAGCCTGTGAGGGCAAGGCTTGAATAATGCTCCTGAAGTCAGCAACTTGATTCCAGCAATTGCGGCCCGAG	AATTCTCGGGCCGCAATTGCTGGAATCAAGTTGCTGACTTCAGGAGCATTATTCAAGCCTTGCCCTCACAGGCTACACAGTCAACTTAATTCCAGGAACTGCAACG	no	no		no
mir-285	UAGCACCAUUCGAAAUCAGUGC	CTAGCTCGAATCGAAGAACTGAGATCGATTGGTGCATAGATATCAGGAGAACCCACTCAATTTAACTCTAGCACCATTCGAAATCAGTGCTTTTGATAAGAAACG	AATTCGTTTCTTATCAAAAGCACTGATTTCGAATGGTGCTAGAGTTAAATTGAGTGGGTTCTCCTGATATCTATGCACCAATCGATCTCAGTTCTTCGATTCGAG	no	no		no
mir-286	UGACUAGACCGAACACUCGUGCU	CTAGCTTAAAATTGAATGGCGAATGTCGGTATGGTCTCTTTTTCAAAGAAAGGTTTCGATTAAGCGAAGTGACTAGACCGAACACTCGTGCTATAATTTTAAAATG	AATTCATTTTAAAATTATAGCACGAGTGTTCGGTCTAGTCACTTCGCTTAATCGAAACCTTTCTTTGAAAAAGAGACCATACCGACATTCGCCATTCAATTTTAAG	no	no		no
mir-287	UGUGUUGAAAAUCGUUUGCAC	CTAGCGGACGCCGGGGATGTATGGGTGTGTAGGGTCTGAAATTTTGCACACATTTACAATAATTGTAAATGTGTTGAAAATCGTTTGCACGACTGTGAG	AATTCTCACAGTCGTGCAAACGATTTTCAACACATTTACAATTATTGTAAATGTGTGCAAAATTTCAGACCCTACACACCCATACATCCCCGGCGTCCG	no	no		no
mir-288	UUUCAUGUCGAUUUCAUUUCAUG	CTAGCCGGCCATGTCGTAATTAGCGGAGCACGGCATCGCCGGCGATAATTAATGACGGTGGTCACGTTGGTTTCATGTCGATTTCATTTCATGACACGGCCGG	AATTCCGGCCGTGTCATGAAATGAAATCGACATGAAACCAACGTGACCACCGTCATTAATTATCGCCGGCGATGCCGTGCTCCGCTAATTACGACATGGCCGG	no	no		no
mir-289	UAAAUAUUUAAGUGGAGCCUGCGACU	CTAGCGAGTTTACAGTAAAATAAATATTTAAGTGGAGCCTGCGACTTCAGTCCCTCTGACTGACTGGGGTAAGTCACTTGAGCGTTTGTTGGCACGTAAAAGACG	AATTCGTCTTTTACGTGCCAACAAACGCTCAAGTGACTTACCCCAGTCAGTCAGAGGGACTGAAGTCGCAGGCTCCACTTAAATATTTATTTTACTGTAAACTCG	no	no		no
mir-303	UUUAGGUUUCACAGGAAACUGGU	CTAGCTCTTGGTTTAGGTTTCACAGGAAACTGGTTTAATAACGAAAACTAGTTTCCTCTAAAATCCTAATCAAGAG	AATTCTCTTGATTAGGATTTTAGAGGAAACTAGTTTTCGTTATTAAACCAGTTTCCTGTGAAACCTAAACCAAGAG	no	+	ectopic vein material	no
mir-304	UAAUCUCAAUUUGUAAAUGUGAG	CTAGCGCAGCATTGAATAATCTCAATTTGTAAATGTGAGCGGTTTAAGCCATTTGACGCACTCACTTTGCAATTGGAGATTGCTCGAGACTGCG	AATTCGCAGTCTCGAGCAATCTCCAATTGCAAAGTGAGTGCGTCAAATGGCTTAAACCGCTCACATTTACAAATTGAGATTATTCAATGCTGCG	no	no		no
mir-305	AUUGUACUUCAUCAGGUGCUCUG	CTAGCCATGTCTATTGTACTTCATCAGGTGCTCTGGTGTGTCTCGTAACCCGGCACATGTTGAAGTACACTCAATATGG	AATTCCATATTGAGTGTACTTCAACATGTGCCGGGTTACGAGACACACCAGAGCACCTGATGAAGTACAATAGACATGG		+	A/P small	lethal
mir-306	UCAGGUACUUAGUGACUCUCAA	CTAGCGTCCACTCGATGGCTCAGGTACTTAGTGACTCTCAATGCTTTTGACATTTTGGGGGTCACTCTGTGCCTGTGCTGCCAGTGGGACG	AATTCGTCCCACTGGCAGCACAGGCACAGAGTGACCCCCAAAATGTCAAAAGCATTGAGAGTCACTAAGTACCTGAGCCATCGAGTGGACG	++	+	curly, smaller wings, thin veins (?)	lethal
mir-307a	UCACAACCUCCUUGAGUGAG	CTAGCTGTCTTGCTTTGACTCACTCAACCTGGGTGTGATGTTATTTCGATATGGTATCCATCACAACCTCCTTGAGTGAGCGATAGCAGGACAG	AATTCTGTCCTGCTATCGCTCACTCAAGGAGGTTGTGATGGATACCATATCGAAATAACATCACACCCAGGTTGAGTGAGTCAAAGCAAGACAG	no	+	smaller wings, slight upward curl, P area bent/curled	lethal
mir-307b	UCACACCCAGGUUGAGUGAGUC	CTAGCTAGTTTCGTGGATACTCTGTCCTGCTATCGCTCACTCAAGGAGGTTGTGATGGATACCATATCGAAATAACATCACACCCAGGTTGAGTGAGTCAAAGCAAGACAAAATGCTGCTAACTTG	AATTCAAGTTAGCAGCATTTTGTCTTGCTTTGACTCACTCAACCTGGGTGTGATGTTATTTCGATATGGTATCCATCACAACCTCCTTGAGTGAGCGATAGCAGGACAGAGTATCCACGAAACTAG	no	no		no
mir-308	AAUCACAGGAUUAUACUGUGAG	CTAGCCTCGCAGTATATTTTTGTGTTTTGTTTCGTTTTGCAATCCAAATCACAGGATTATACTGTGAGG	AATTCCTCACAGTATAATCCTGTGATTTGGATTGCAAAACGAAACAAAACACAAAAATATACTGCGAGG	no	+	smaller wings, slightly bent	lethal
mir-309	GCACUGGGUAAAGUUUGUCCUA	CTAGCATTATACGACAAACCTTGTTCGGTTTTGCCAATTTCCAAGCCAGCACTGGGTAAAGTTTGTCCTATAATG	AATTCATTATAGGACAAACTTTACCCAGTGCTGGCTTGGAAATTGGCAAAACCGAACAAGGTTTGTCGTATAATG	no	no		no
mir-310	UAUUGCACACUUCCCGGCCUUU	CTAGCAACATAAACATTTGCAGGGCGGGTCGTGTGTCAGTGTATTTATATCTTAGCTATATTGCACACTTCCCGGCCTTTAAATGTCCAATGTTG	AATTCAACATTGGACATTTAAAGGCCGGGAAGTGTGCAATATAGCTAAGATATAAATACACTGACACACGACCCGCCCTGCAAATGTTTATGTTG	no	no		no
mir-311	UAUUGCACAUUCACCGGCCUGA	CTAGCTCTAGATCATTTTTCGGACGGTATATGGGTTAATATTTCATTTGTCGAATATATTGCACATTCACCGGCCTGAAAATATCAAGAG	AATTCTCTTGATATTTTCAGGCCGGTGAATGTGCAATATATTCGACAAATGAAATATTAACCCATATACCGTCCGAAAAATGATCTAGAG	no	no		no
mir-312	UAUUGCACUUGAGACGGCCUGA	CTAGCGATTTGGTTCGTCACAAGGGCAATTCTGCATTTTTTAACTAGTATTGCACTTGAGACGGCCTGATTG	AATTCAATCAGGCCGTCTCAAGTGCAATACTAGTTAAAAAATGCAGAATTGCCCTTGTGACGAACCAAATCG	no	+	wing hairs missing in patches, curly wings, thin veins in posterior part, ectopic campaniform sensillae	lethal
mir-313	UAUUGCACUUUUCACAGCCCGA	CTAGCATTTTCTGCTGCGGATGGGGGCAGTACTGTTTTTTTAACATTGAGTATTGCACTTTTCACAGCCCGAAAATG	AATTCATTTTCGGGCTGTGAAAAGTGCAATACTCAATGTTAAAAAAACAGTACTGCCCCCATCCGCAGCAGAAAATG	no	no		no
mir-314	UAUUCGAGCCAAUAAGUUCGG	CTAGCTCGTAACTTGTGTGGCTTCGAACTTACCTAGTTGAGGAAAACTCCCATGTCGGATTTTGTTACCTCTGGTATTCGAGCCAATAAGTTCGGG	AATTCCCGAACTTATTGGCTCGAATACCAGAGGTAACAAAATCCGACATGGGAGTTTTCCTCAACTAGGTAAGTTCGAAGCCACACAAGTTACGAG	no	no		no
mir-315	UUUUGAUUGUUGCUCAGAAAGC	CTAGCCACTTATATAATTTTGATTGTTGCTCAGAAAGCCCTCATTGTTTACCAGTTGGCTTTCGAGCAATAATTGAAACCAGATAAGTGG	AATTCCACTTATCTGGTTTCAATTATTGCTCGAAAGCCAACTGGTAAACAATGAGGGCTTTCTGAGCAACAATCAAAATTATATAAGTGG	+	+	A/P small	lethal
mir-316	UGUCUUUUUCCGCUUACUGGCG	CTAGCAAATTCTAGTCGATTTGTCTTTTTCCGCTTACTGGCGTTTCAATTCCACAACGACAGGAAAGGGAAAAAGGCGTATTTACTATGAGTTTG	AATTCAAACTCATAGTAAATACGCCTTTTTCCCTTTCCTGTCGTTGTGGAATTGAAACGCCAGTAAGCGGAAAAAGACAAATCGACTAGAATTTG	no	+	curly wings	no
mir-317	UGAACACAGCUGGUGGUAUCCAGU	CTAGCATGCAACTGCCATTGGGATACACCCTGTGCTCGCTTTGAATGAAATGCAAGCAAGTGAACACAGCTGGTGGTATCCAGTGGCCGTTTGGCATG	AATTCATGCCAAACGGCCACTGGATACCACCAGCTGTGTTCACTTGCTTGCATTTCATTCAAAGCGAGCACAGGGTGTATCCCAATGGCAGTTGCATG	+ (weak)	++	dorsal curl, 45no90°, smaller wing size, ectopic crossvein between L2 and L3 (distally)	lethal
mir-318	UCACUGGGCUUUGUUUAUCUCA	CTAGCTTTATGGGATACACACAGTTCAGTTTTGTCACACTTCAAGCATCACTGGGCTTTGTTTATCTCATGAGG	AATTCCTCATGAGATAAACAAAGCCCAGTGATGCTTGAAGTGTGACAAAACTGAACTGTGTGTATCCCATAAAG	no	+	A/P small	lethal
mir-375	UUUGUUCGUUUGGCUUAAGUUA	CTAGCCCGGGCAGCGAATTACTTGGGCCAAGGGAATGCAAACTGTGATCATCCCGAAAGTTTGTTCGTTTGGCTTAAGTTATTTTCATGTCCGACTG	AATTCAGTCGGACATGAAAATAACTTAAGCCAAACGAACAAACTTTCGGGATGATCACAGTTTGCATTCCCTTGGCCCAAGTAATTCGCTGCCCGGG	no	no/+	slightly curled wings	lethal
mir-927	UUUAGAAUUCCUACGCUUUACC	CTAGCTGGTTGCTGTAGAGTTTTAGAATTCCTACGCTTTACCGTGGCATACGAAATTCGGCAAAGCGTTTGGATTCTGAAACCCTACCGATCCATTAG	AATTCTAATGGATCGGTAGGGTTTCAGAATCCAAACGCTTTGCCGAATTTCGTATGCCACGGTAAAGCGTAGGAATTCTAAAACTCTACAGCAACCAG	lethal (male)/++ (female)	lethal		lethal
mir-929	CUCCCUAACGGAGUCAGAUUG	CTAGCAGTCCTGGTGGAGCTCAAATTGACTCTAGTAGGGAGTCCTTTAATGAGCGACTCCCTAACGGAGTCAGATTGAGCTGCAAAGGAGCGAG	AATTCTCGCTCCTTTGCAGCTCAATCTGACTCCGTTAGGGAGTCGCTCATTAAAGGACTCCCTACTAGAGTCAATTTGAGCTCCACCAGGACTG	no	no		no
mir-932	UCAAUUCCGUAGUGCAUUGCAG	CTAGCTTGGTTTTGAAGTTTTCAATTCCGTAGTGCATTGCAGTGTGTTTCATTATTTACTGCAAGCGCTGCGGATTTGGCAACTTTGACGACCTTCG	AATTCGAAGGTCGTCAAAGTTGCCAAATCCGCAGCGCTTGCAGTAAATAATGAAACACACTGCAATGCACTACGGAATTGAAAACTTCAAAACCAAG	lethal/+++	+	A/P small	lethal
mir-954	UCUGGGUGUUGCGUUGUGUGU	CTAGCTACAAACACAAGATTTTCTGGGTGTTGCGTTGTGTGTACCTGTGTACAGGCGTATTCACATGCAACATCCCTTACATCTTGCTTGATG	AATTCATCAAGCAAGATGTAAGGGATGTTGCATGTGAATACGCCTGTACACAGGTACACACAACGCAACACCCAGAAAATCTTGTGTTTGTAG	no	no		no
mir-955	CAUCGUGCAGAGGUUUGAGUGUC	CTAGCGGCCAGCTAATCAACTCCATCGTGCAGAGGTTTGAGTGTCCTGTGTTTTGCCTAATCGCATTCAATTTCTGAACGGTAGAGATGGTACGCTTAGAAAG	AATTCTTTCTAAGCGTACCATCTCTACCGTTCAGAAATTGAATGCGATTAGGCAAAACACAGGACACTCAAACCTCTGCACGATGGAGTTGATTAGCTGGCCG	no	no		no
mir-956	UUUCGAGACCACUCUAAUCCAUU	CTAGCGATCGTTATCGTGTTTGGAATGGTCTCGTTAGCTAACGGATGAGCAAGTGCTCGGCTCACTGGCCCAAATGCAGTTTGCCCGGAGACGCCGGTT	AATTCAAATGCTGCAATGGATTAGAGTGGTCTCGAAACTACACATTTCAGTGCTGGGTTAACCGGCGTCTCCGGGCAAACTGCATTTGGGCCAGTG	no	no		no
mir-957	UGAAACCGUCCAAAACUGAGGC	CTAGCTGTCCACAATAGACCTTAGTTTTCGACGTGTTTTGGTGTGCTGGGGAGTTCTATTCCGATTGAAACCGTCCAAAACTGAGGCCAACTGTGAGGCGCG	AATTCGCGCCTCACAGTTGGCCTCAGTTTTGGACGGTTTCAATCGGAATAGAACTCCCCAGCACACCAAAACACGTCGAAAACTAAGGTCTATTGTGGACAG	no	no		no
mir-958	UGAGAUUCUUCUAUUCUACUUU	CTAGCGGCGTGTCTATGGCAAGTAGAATAGCAGGCTTATCACATGTTTAATTCAATCTGCTGTGAGATTCTTCTATTCTACTTTCGACAACACCCGTG	AATTCACGGGTGTTGTCGAAAGTAGAATAGAAGAATCTCACAGCAGATTGAATTAAACATGTGATAAGCCTGCTATTCTACTTGCCATAGACACGCCG	no	+	slightly curly wings, some flies ectopic vein btw L2&L3 (no>miRno317), anocv missing in most flies	no
mir-959	UUGUCAUCGGGGGUAUUAUGAA	CTAGCTTAACTTTGTTCTATATTCTTAGTACTCGGGTTGATAAAGACCTTTTCTTCAGGGAGCCTTTGTCATCGGGGGTATTATGAAATATAGTTTAAAGAAAG	AATTCTTTCTTTAAACTATATTTCATAATACCCCCGATGACAAAGGCTCCCTGAAGAAAAGGTCTTTATCAACCCGAGTACTAAGAATATAGAACAAAGTTAAG	no	no		no
mir-960	UGAGUAUUCCAGAUUGCAUAGC	CTAGCGGGTTTTGTACCACATTCTGAGTATTCCAGATTGCATAGCTTTGTGCTACTATTGCTATACGGTCTGGGACACTTTTAACATGGTATCAAATCG	AATTCGATTTGATACCATGTTAAAAGTGTCCCAGACCGTATAGCAATAGTAGCACAAAGCTATGCAATCTGGAATACTCAGAATGTGGTACAAAACCCG	no	no		+	some flies have black bulges/outgrowth on head
mir-961	UUUGAUCACCAGUAACUGAGAU	CTAGCTCAAGGGCCGAGTTACCTTTGATCACCAGTAACTGAGATTGTTTCTGATACGGTTTCGTTTTCTGGCAATCAAAAGAACTTGGACTCGAG	AATTCTCGAGTCCAAGTTCTTTTGATTGCCAGAAAACGAAACCGTATCAGAAACAATCTCAGTTACTGGTGATCAAAGGTAACTCGGCCCTTGAG	no	no		no
mir-962	AUAAGGUAGAGAAAUUGAUGCUGUC	CTAGCGATGGGGCACTCAGGCTATAAGGTAGAGAAATTGATGCTGTCTACACTATTCAGACTTCAGTTTCATTACCTTTCAATTTGTTTGCCCCCATG	AATTCATGGGGGCAAACAAATTGAAAGGTAATGAAACTGAAGTCTGAATAGTGTAGACAGCATCAATTTCTCTACCTTATAGCCTGAGTGCCCCATCG	no	no		no
mir-963	ACAAGGUAAAUAUCAGGUUGUUUC	CTAGCTTAGTCTAATCTAAAACAAGGTAAATATCAGGTTGTTTCCTGTATTCGATCGAAACATCTGTATATACCTTTGTTCCGATTGGACAAAAG	AATTCTTTTGTCCAATCGGAACAAAGGTATATACAGATGTTTCGATCGAATACAGGAAACAACCTGATATTTACCTTGTTTTAGATTAGACTAAG	no	+	phenotype slightly stronger than in female	lethal
mir-964	UUAGAAUAGGGGAGCUUAACUU	CTAGCCAATAACATATTGGTCCAACTTGCCTTAGAATAGGGGAGCTTAACTTATGTTTTTGATGTTTAAGTTAAAAGCCTCTGTTCTAAGACAATTTGATGATCAG	AATTCTGATCATCAAATTGTCTTAGAACAGAGGCTTTTAACTTAAACATCAAAAACATAAGTTAAGCTCCCCTATTCTAAGGCAAGTTGGACCAATATGTTATTGG	no	++/+++	very small wings, black and blistered where PT is not so strong	lethal
mir-965	UAAGCGUAUAGCUUUUCCCCUU	CTAGCGACAATATTGCTCAACATTTTGGGGGGTAAAACTGTACGTTATATGTGCCCTTCTGTGATATTCATAAGCGTATAGCTTTTCCCCTTAAAAGTTAGAGCTATTGCAAG	AATTCTTGCAATAGCTCTAACTTTTAAGGGGAAAAGCTATACGCTTATGAATATCACAGAAGGGCACATATAACGTACAGTTTTACCCCCCAAAATGTTGAGCAATATTGTCG	++ (male lethal)	lethal		lethal
mir-966	UGUGGGUUGUGGGCUGUGUGG	CTAGCAACCTGATCCGCTGCTGTGGGTTGTGGGCTGTGTGGCTGTGGTATAGGTGCCGCCAGTTGATAACCCCCAGCGTGGGCACGGACCCAG	AATTCTGGGTCCGTGCCCACGCTGGGGGTTATCAACTGGCGGCACCTATACCACAGCCACACAGCCCACAACCCACAGCAGCGGATCAGGTTG	no	no		no
mir-967	AGAGAUACCUCUGGAGAAGCG	CTAGCCTTGGAGAGCAGAGATACCTCTGGAGAAGCGCGTGACCTGACCCCAGCAGGAGAACCCAACCCGCTTTTCCACCTAGGTGTCTCTCTCTCTCTTTATG	AATTCATAAAGAGAGAGAGAGACACCTAGGTGGAAAAGCGGGTTGGGTTCTCCTGCTGGGGTCAGGTCACGCGCTTCTCCAGAGGTATCTCTGCTCTCCAAGG	no	no		no
mir-968	UAAGUAGUAUCCAUUAAAGGGUUG	CTAGCTGATGGAAGCTTCCTTAAGTAGTATCCATTAAAGGGTTGTTCTCAACATGCAAATCAACCTTTTGATGTACTACTTTAAGAATCTCCAGTTAG	AATTCTAACTGGAGATTCTTAAAGTAGTACATCAAAAGGTTGATTTGCATGTTGAGAACAACCCTTTAATGGATACTACTTAAGGAAGCTTCCATCAG	lethal	lethal		lethal
mir-969	GAGUUCCACUAAGCAAGUUUU	CTAGCAGTCTCTGTCCTACGTCCGAGTTCCACTAAGCAAGTTTTGAGATCGTTTTAAAAACAAAAACTTGACACGTTGAGCTCGTTCGTGGGATGGACTG	AATTCAGTCCATCCCACGAACGAGCTCAACGTGTCAAGTTTTTGTTTTTAAAACGATCTCAAAACTTGCTTAGTGGAACTCGGACGTAGGACAGAGACTG	no	no		lethal
mir-970	UCAUAAGACACACGCGGCUAU	CTAGCGAAAGGCATCTGTTGCAGCTAGCGGGTGTTTTATTTGGTAGCTGTAATGATTTGAATCTATCATAAGACACACGCGGCTATAACCGTTGTCTAAGG	AATTCCTTAGACAACGGTTATAGCCGCGTGTGTCTTATGATAGATTCAAATCATTACAGCTACCAAATAAAACACCCGCTAGCTGCAACAGATGCCTTTCG	no	no/+	very mild curling	no
mir-971	UUGGUGUUACUUCUUACAGUGA	CTAGCTCCGTGGCTGGCATCGCTCGCTGTAAATTGTAATCATCAAAGCGTTTTCTCAGAGCCGCTTGGTGTTACTTCTTACAGTGAGTGTGCCAGTCCGTAG	AATTCTACGGACTGGCACACTCACTGTAAGAAGTAACACCAAGCGGCTCTGAGAAAACGCTTTGATGATTACAATTTACAGCGAGCGATGCCAGCCACGGAG	+	+	vein defect, anocv missing, slightly smaller wings ectopic sensory bristles distally near L3	lethal
mir-972	UGUACAAUACGAAUAUUUAGGC	CTAGCAGAATGATAGGGAAATTGCTAAATATTTTTTTTGTATAAATAACTTTTAACTTTTGTACAATACGAATATTTAGGCATTTCTCAAATCAAAG	AATTCTTTGATTTGAGAAATGCCTAAATATTCGTATTGTACAAAAGTTAAAAGTTATTTATACAAAAAAAATATTTAGCAATTTCCCTATCATTCTG	no	no		no
mir-973	UGGUUGGUGGUUGAACUUCGAUUUU	CTAGCACCGTCGTCGACTTTTCGTGGTTGGTGGTTGAACTTCGATTTTAAGTATTTAAATAAAATGAAATCTGTTCATTCTCCGACACAAGAAGTTCACGCAAAGGG	AATTCCCTTTGCGTGAACTTCTTGTGTCGGAGAATGAACAGATTTCATTTTATTTAAATACTTAAAATCGAAGTTCAACCACCAACCACGAAAAGTCGACGACGGTG	no	no		no
mir-974	AAGCGAGCAAAGAAGUAGUAUU	CTAGCCAATTGTCACCGGTCATGTCCTCCAAGCGAGCAAAGAAGTAGTATTTGTGTTTCCAAGAGCAAATATAACTTCATTGGAAGCTAAGTGGATTTGCCCAAATG	AATTCATTTGGGCAAATCCACTTAGCTTCCAATGAAGTTATATTTGCTCTTGGAAACACAAATACTACTTCTTTGCTCGCTTGGAGGACATGACCGGTGACAATTGG	no	no		no
mir-975	UAAACACUUCCUACAUCCUGUAU	CTAGCTTGAATTTTTGATTTTAAACACTTCCTACATCCTGTATGTGTTTTGCATCCGGTACAGATGTGGGAGTCGTTTGCACTCAGAGATTTCACAG	AATTCTGTGAAATCTCTGAGTGCAAACGACTCCCACATCTGTACCGGATGCAAAACACATACAGGATGTAGGAAGTGTTTAAAATCAAAAATTCAAG	no	no		no
mir-976	UUGGAUUAGUUAUCAUCAAUGC	CTAGCCATCGCCATGCAGTGCCGCGGCATTGGTGAGGCCATCTCCAATGGATTAGTTCTCAACATTGGATTAGTTATCATCAATGCCGGTGCACTGCACCTAG	AATTCTAGGTGCAGTGCACCGGCATTGATGATAACTAATCCAATGTTGAGAACTAATCCATTGGAGATGGCCTCACCAATGCCGCGGCACTGCATGGCGATGG	no	+	slight upward curl, L5 mostly forked P	no
mir-977	UGAGAUAUUCACGUUGUCUAA	CTAGCCGAATCAACAAACAAGGTATGCTTTAGATAACTCGAATATCACATCTTCAGTGTTCGAAATCTGATGAGATATTCACGTTGTCTAAATCATGTTTTGTAG	AATTCTACAAAACATGATTTAGACAACGTGAATATCTCATCAGATTTCGAACACTGAAGATGTGATATTCGAGTTATCTAAAGCATACCTTGTTTGTTGATTCGG	lethal/+++	lethal		lethal
mir-978	UGUCCAGUGCCGUAAAUUGCAG	CTAGCGTTGGCGGCACAATCTGCAATCTACGCCACTGGCTTACGTTGCAATCGAAAATCGTGTCCAGTGCCGTAAATTGCAGTTGTGTGAACGCAAAG	AATTCTTTGCGTTCACACAACTGCAATTTACGGCACTGGACACGATTTTCGATTGCAACGTAAGCCAGTGGCGTAGATTGCAGATTGTGCCGCCAACG	no	+	slight curling	lethal
mir-979	UUCUUCCCGAACUCAGGCUAA	CTAGCTACATGTGAGGATGTCACAAATACACTGAATTTGGGGGGAATTCTTATGTATATACAAATTCTTCCCGAACTCAGGCTAATTTTGTGGCATCCGTG	AATTCACGGATGCCACAAAATTAGCCTGAGTTCGGGAAGAATTTGTATATACATAAGAATTCCCCCCAAATTCAGTGTATTTGTGACATCCTCACATGTAG	no	no		no
mir-980	UAGCUGCCUUGUGAAGGGCUUA	CTAGCAGTTGATTGTATGTCAGTTTTTCATTTGGCCTGGCTAGCTTACTCCTTTTTAAATATTGCTAGCTGCCTTGTGAAGGGCTTACGTGTAATTGCAGTTCG	AATTCGAACTGCAATTACACGTAAGCCCTTCACAAGGCAGCTAGCAATATTTAAAAAGGAGTAAGCTAGCCAGGCCAAATGAAAAACTGACATACAATCAACTG	no	+	wings blistered, sometimes one blister in center of wing (almost perfectly circular). Curly wings, ectopic vein material at edges of wing	lethal
mir-981	UUCGUUGUCGACGAAACCUGCA	CTAGCAAACATCCTCACTGAAGTCGGGTTTCGTTAGCAGCGGGCTGTTTTAATAAATTCAACAAGTTCGTTGTCGACGAAACCTGCATGCTGTGTGGAAAATG	AATTCATTTTCCACACAGCATGCAGGTTTCGTCGACAACGAACTTGTTGAATTTATTAAAACAGCCCGCTGCTAACGAAACCCGACTTCAGTGAGGATGTTTG	lethal/+++	lethal		lethal
mir-982	UCCUGGACAAAUAUGAAGUAAAU	CTAGCCGAAATCATGTTAGATCCTGGACAAATATGAAGTAAATTGTTTTTATGCATCAATTACTTGATATTCATCCTTGAACTAAATGGTTTTAGAGCG	AATTCGCTCTAAAACCATTTAGTTCAAGGATGAATATCAAGTAATTGATGCATAAAAACAATTTACTTCATATTTGTCCAGGATCTAACATGATTTCGG	no	no		lethal
mir-983-1	AUAAUACGUUUCGAACUAAUGA	CTAGCTATATTGCAATAATTAAATAATACGTTTCGAACTAATGATTTTCAGTTCATTCATTAGGTAGTTACGCATTATCTAGTTGTTGTAAACATTG	AATTCAATGTTTACAACAACTAGATAATGCGTAACTACCTAATGAATGAACTGAAAATCATTAGTTCGAAACGTATTATTTAATTATTGCAATATAG	no	+	mild curling in PD direction	lethal
mir-983-2	AUUCAUUAGGUAGUUACGCAUUAUCU	CTAGCTATTATATTGCAATAATTAAATAATACGTTTCGAACTAATGATTTTCAGTTCATTCATTAGGTAGTTACGCATTATCTAGTTGTTGTAAACATTCAACTG	AATTCAGTTGAATGTTTACAACAACTAGATAATGCGTAACTACCTAATGAATGAACTGAAAATCATTAGTTCGAAACGTATTATTTAATTATTGCAATATAATAG	no	+	curly wings	lethal
mir-984	UGAGGUAAAUACGGUUGGAAUUU	CTAGCAGAAACAAATTTCATTGAGGTAAATACGGTTGGAATTTTGTCTTTTAACTATAAATCCAACCGAATTTGGCTCGGCGAAATTTTTCAGTTG	AATTCAACTGAAAAATTTCGCCGAGCCAAATTCGGTTGGATTTATAGTTAAAAGACAAAATTCCAACCGTATTTACCTCAATGAAATTTGTTTCTG	no	no		no
mir-985	CAAAUGUUCCAAUGGUCGGGCA	CTAGCTATATAATAGCACTGCTGGCTCATTGGTACATTTCATAAGTACCTTATCAAATGTTCCAATGGTCGGGCAGAGCTATTATTTGTCCG	AATTCGGACAAATAATAGCTCTGCCCGACCATTGGAACATTTGATAAGGTACTTATGAAATGTACCAATGAGCCAGCAGTGCTATTATATAG	no	no		no
mir-986	UCUCGAAUAGCGUUGUGACUGA	CTAGCCACACCTGAAATTACCCATCTCGAATAGCGTTGTGACTGAGGTAACTGCGCATCGAATCTACTCAGCGGCGAGGCTATTCAAGTAAGGTTATTTTGGGCCG	AATTCGGCCCAAAATAACCTTACTTGAATAGCCTCGCCGCTGAGTAGATTCGATGCGCAGTTACCTCAGTCACAACGCTATTCGAGATGGGTAATTTCAGGTGTGG	no	no		no
mir-987	UAAAGUAAAUAGUCUGGAUUGAUG	CTAGCTGTTGGACTGTGTTTAAAGTAAATAGTCTGGATTGATGAAAGTTGCATTCGAGAATTCATCAACAGGCATTTACTTCAACTGCAGTTTGAACAAG	AATTCTTGTTCAAACTGCAGTTGAAGTAAATGCCTGTTGATGAATTCTCGAATGCAACTTTCATCAATCCAGACTATTTACTTTAAACACAGTCCAACAG	no	no		no
mir-988	CCCCUUGUUGCAAACCUCACGC	CTAGCGACGGCGGTACCGGGCATTTTGGGTGTGTGATTTGTAGCAAAGTGATATGTATTTGATCATCCCCTTGTTGCAAACCTCACGCCAAAGATGATCTGCGAG	AATTCTCGCAGATCATCTTTGGCGTGAGGTTTGCAACAAGGGGATGATCAAATACATATCACTTTGCTACAAATCACACACCCAAAATGCCCGGTACCGCCGTCG	no	no		no
mir-989	UGUGAUGUGACGUAGUGGAAC	CTAGCAAAGATTTTGGGAATCGGCCACTACCTTGCAGTCACGTGATGAAAAGACACAGGTGACACTGATCCGGATTTGGTAGTTGACAAATCCTCCATGCCGAGATTAGTTT	AATTCTGTAATTTCAGGTATGTTCCACTACGTCACATCACATGAACTATTCGAATTCAAAAGACGCAAAATGAAACTAATCTCGGCATGGAGGATTTGTCAACTACCAAATC	no	+	A/P small, dorsal bend	++	80% lethal, survivors have small, rough eyes, one fly had malformed thorax
mir-990	AUUCACCGUUCUGAGUUGGCC	CTAGCTCTGCTCTGCGACATTCACCGTTCTGAGTTGGCCCCAAGTGCACGTGGGCCAGCTTTCAGCTTCGGTGCCATTTCACCCCGAGCACG	AATTCGTGCTCGGGGTGAAATGGCACCGAAGCTGAAAGCTGGCCCACGTGCACTTGGGGCCAACTCAGAACGGTGAATGTCGCAGAGCAGAG	no	no		no
mir-991	UUAAAGUUGUAGUUUGGAAAGU	CTAGCTATCACTGCAGTTTCAGGCTTTTCCCAACTACACCTATTAATACATATTTTAACGTCCTATTAAAGTTGTAGTTTGGAAAGTTTTGGTTTTGCATTG	AATTCAATGCAAAACCAAAACTTTCCAAACTACAACTTTAATAGGACGTTAAAATATGTATTAATAGGTGTAGTTGGGAAAAGCCTGAAACTGCAGTGATAG	no			lethal
mir-992	AGUACACGUUUCUGGUACUAAG	CTAGCATTTTCCCAAGTGCCTGGTATCAGCAAAGTGTTATTTTTTATGTTTATGTAAAGTACACGTTTCTGGTACTAAGTACTTCGAGAAAGTTACCG	AATTCGGTAACTTTCTCGAAGTACTTAGTACCAGAAACGTGTACTTTACATAAACATAAAAAATAACACTTTGCTGATACCAGGCACTTGGGAAAATG	+	+	most wings narrow (not all), disturbed polarity (?)	lethal
mir-993	GAAGCUCGUCUCUACAGGUAUCU	CTAGCAACGCTCCCGTGACCTACCCTGTAGTTCCGGGCTTTTGTTTAAATGGCGTTCGGCACATTGTCGGACTGCTGGCTCGATTATCAGAAGCTCGTCTCTACAGGTATCTCACAGGGTAGAAG	AATTCTTCTACCCTGTGAGATACCTGTAGAGACGAGCTTCTGATAATCGAGCCAGCAGTCCGACAATGTGCCGAACGCCATTTAAACAAAAGCCCGGAACTACAGGGTAGGTCACGGGAGCGTTG	no	no		lethal
mir-994	CUAAGGAAAUAGUAGCCGUGAU	CTAGCTATCGAGTTATCTAAGGAAATAGTAGCCGTGATTTTACCCAAGAATTTTTCACATATCACAGTTGCTGTTTCTTTTAGATAGCTCTTTTGTG	AATTCACAAAAGAGCTATCTAAAAGAAACAGCAACTGTGATATGTGAAAAATTCTTGGGTAAAATCACGGCTACTATTTCCTTAGATAACTCGATAG	no	no		lethal
mir-995	UAGCACCACAUGAUUCGGCUU	CTAGCCACCTGCACCCCGCAGCCCGAATTATGTGGGAGCTGCGCCGTTTCCGTAATCCGTAGCACCACATGATTCGGCTTCGTGGTACAGGATATG	AATTCATATCCTGTACCACGAAGCCGAATCATGTGGTGCTACGGATTACGGAAACGGCGCAGCTCCCACATAATTCGGGCTGCGGGGTGCAGGTGG	+ (in some males)	++	small wings, curly and twisted, layers dont adhere properly	lethal
mir-996	UGACUAGAUUUCAUGCUCGUCU	CTAGCTCTGACTCTATTTTGTCGGCGAACATGGATCTAGTGCACGGTGGTTCATGATTAAGTTCGTGACTAGATTTCATGCTCGTCTATTAAGTTGGGTCAGG	AATTCCTGACCCAACTTAATAGACGAGCATGAAATCTAGTCACGAACTTAATCATGAACCACCGTGCACTAGATCCATGTTCGCCGACAAAATAGAGTCAGAG	no	no		no
mir-997	CCCAAACUCGAAGGAGUUUCA	TTATGGATCCTCTTTCAATGAATTTAGTATGCCCAAACTCGGAAGGAGTTTCACCTCCATAAGAGCGACAGTCCTGGAGAAGTTATCAGAGCCAAAAAAATTCATATGATGATGCATTTTCCGTCT *(requires Primer miR-997-for for amplification)	TGCCGATCCAAGCATCCAATGTCGTTAGTATGATCAAAATCGAATGAGTTTCACTTCGCTAAAAACAACTTCTGCTGAAGACGTTTTCAGAGACGGAAAATGCATCATCATATGAATTTTTTTGG *(requires Primer miR-997-rv for amplification)	no	no		no
mir-998	UAGCACCAUGAGAUUCAGCUC	CTAGCCCTCGTGTCAAATTCATTTTGGAACTGAATTCTCGTGGGTCTGCACTGACAACACTGACCGCTCCAGGGCAAATTGTTCATTTTGAAATT	AATTCATGCATGTTTGAAATTCACGCCAGAGCTGAATCTCATGGTGCTACAGAATTTCAATTTCAAAATGAACAATTTGCCCTGGAGCGGTCAGT	no	no		no
mir-999	UGUUAACUGUAAGACUGUGUCU	CTAGCAAGGATGCCGCTCAATTACCCCGACATAGTCATACGGTGAATGTTGTGTATTGGAGACCAATGTTAACTGTAAGACTGTGTCTCGGTGGTTGCCAGCCCAGCCACG	AATTCGTGGCTGGGCTGGCAACCACCGAGACACAGTCTTACAGTTAACATTGGTCTCCAATACACAACATTCACCGTATGACTATGTCGGGGTAATTGAGCGGCATCCTTG	no	+/ largely lethal	survivors' wings stick together distally by some yellow, tough matter	lethal
mir-1000	AUAUUGUCCUGUCACAGCAGU	CTAGCGACGCTTGCCATTGATATTGTCCTGTCACAGCAGTATTGTAACACTATATTATAGTTTACTGCTGGGTCGGGGCATTAACATTGTTGAGCGTCATTAGCAG	AATTCTGCTAATGACGCTCAACAATGTTAATGCCCCGACCCAGCAGTAAACTATAATATAGTGTTACAATACTGCTGTGACAGGACAATATCAATGGCAAGCGTCG	no	no		no
mir-1001	UGGGUAAACUCCCAAGGAUCA	CTAGCAAGCTGGCCTGTCCCTGGGTAAACTCCCAAGGATCAGGTGGAGATTGAATCCCGATCCTTGGGTTTCTGCTCTCGGGCAAGGTCAGTAGTG	AATTCACTACTGACCTTGCCCGAGAGCAGAAACCCAAGGATCGGGATTCAATCTCCACCTGATCCTTGGGAGTTTACCCAGGGACAGGCCAGCTTG	no	no		lethal	lethality only in males
mir-1002	UUAAGUAGUGGAUACAAAGGGCGA	CTAGCTAGAAATTATATATTTAAGTAGTGGATACAAAGGGCGATTTGATATAAAAGTGTCGCATTGTATGACCTACTTAACTAGCTGATTTTGTG	AATTCACAAAATCAGCTAGTTAAGTAGGTCATACAATGCGACACTTTTATATCAAATCGCCCTTTGTATCCACTACTTAAATATATAATTTCTAG	no	no		no
mir-1003	UCUCACAUUUACAUAUUCACAG	CTAGCGTGGGTATCTGGATGTGGTTGGCTCTGGCGGTCCTCTCACATTTACATATTCACAGG	AATTCCTGTGAATATGTAAATGTGAGAGGACCGCCAGAGCCAACCACATCCAGATACCCACG	no	+	dorsal curl, concave wings	no
mir-1004	UCUCACAUCACUUCCCUCACAG	CTAGCGTTGGGGGACATTGATCTCGGAGACGGCGGTTTAACTGATCCATTCTCTCACATCACTTCCCTCACAGG	AATTCCTGTGAGGGAAGTGATGTGAGAGAATGGATCAGTTAAACCGCCGTCTCCGAGATCAATGTCCCCCAACG	no	no		no
mir-1005	UCUGGAAUCUUUAAUUCGCAG	CTAGCGTGAGTTGATCGATTTCGAGGTTTTGGCACACGAATATAATCTGGAATCTTTAATTCGCAGG	AATTCCTGCGAATTAAAGATTCCAGATTATATTCGTGTGCCAAAACCTCGAAATCGATCAACTCACG	no	no		no
mir-1006	UAAAUUCGAUUUCUUAUUCAUAG	CTAGCGTGAGTTTGAAATTGAAATGCGTAAATTGTTTGGTACAATTTAAATTCGATTTCTTATTCATAGG	AATTCCTATGAATAAGAAATCGAATTTAAATTGTACCAAACAATTTACGCATTTCAATTTCAAACTCACG	no	+	posterior and distal vein & margin defect	lethal
mir-1007	UAAGCUCAAUUAACUGUUUGCA	CTAGCGTAAGCAGTGTTTGAACTCGATCTTGGTTCTTGGACTCTTGATAAGCTCAATTAACTGTTTGCAGG	AATTCCTGCAAACAGTTAATTGAGCTTATCAAGAGTCCAAGAACCAAGATCGAGTTCAAACACTGCTTACG	no	no		no
mir-1008	UCACAGCUUUUUGUGUUUACA	CTAGCGTAAATATCTAAAGTTGAACTTGGCCAATGGCAAGTCACAGCTTTTTGTGTTTACAGG	AATTCCTGTAAACACAAAAAGCTGTGACTTGCCATTGGCCAAGTTCAACTTTAGATATTTACG	no	no		no
mir-1009	UCUCAAAAAUUGUUACAUUUCAG	CTAGCGTAAGTGTAAGACTTTCTTGAGTTACCCGCGATGAGTATCTCAAAAATTGTTACATTTCAGG	AATTCCTGAAATGTAACAATTTTTGAGATACTCATCGCGGGTAACTCAAGAAAGTCTTACACTTACG	no	no		no
mir-1010	UUUCACCUAUCGUUCCAUUUGCAG	CTAGCGTAAGTGGTGTAGATGAAACAAATTTACCAACAATTTTGTTGGATTGTTTCACCTATCGTTCCATTTGCAGG	AATTCCTGCAAATGGAACGATAGGTGAAACAATCCAACAAAATTGTTGGTAAATTTGTTTCATCTACACCACTTACG	no	no		no
mir-1011	UUAUUGGUUCAAAUCGCUCGCAG	CTAGCGTGAGTTTTTGAGCCAGGAATATAGTTCTTATTATTGGTTCAAATCGCTCGCAGG	AATTCCTGCGAGCGATTTGAACCAATAATAAGAACTATATTCCTGGCTCAAAAACTCACG	no	no		no
mir-1012	UUAGUCAAAGAUUUUCCCCAUAG	CTAGCGTGGGTAGAACTTTGATTAATATTGCTTGAAAAATATTAGTCAAAGATTTTCCCCATAGG	AATTCCTATGGGGAAAATCTTTGACTAATATTTTTCAAGCAATATTAATCAAAGTTCTACCCACG	no	+	A/P slightly smaller	no
mir-1013	AUAAAAGUAUGCCGAACUCG	CTAGCGTGAGTTTCGTACACTTAATTAATAGGATCGGCCGTTAATAAAAGTATGCCGAACTCGCAGG	AATTCCTGCGAGTTCGGCATACTTTTATTAACGGCCGATCCTATTAATTAAGTGTACGAAACTCACG	no	no		no
mir-1014	AAAAUUCAUUUUCAUUUGCAG	CTAGCGTATAATGGAAATAGATTTTAATCGCAGGCGCGTCAGTGGTTGAATTAAAATTCATTTTCATTTGCAGG	AATTCCTGCAAATGAAAATGAATTTTAATTCAACCACTGACGCGCCTGCGATTAAAATCTATTTCCATTATACG	no	no		no
mir-1015	UCCUGGGACAUCUCUCUUGCAG	CTAGCGTGAGTGATGCTCCAGTTAGCTTGGCTGAGTGAGGATTTAAGTCCTGGGACATCTCTCTTGCAGG	AATTCCTGCAAGAGAGATGTCCCAGGACTTAAATCCTCACTCAGCCAAGCTAACTGGAGCATCACTCACG	no	no		no
mir-1016	UUCACCUCUCUCCAUACUUAG	CTAGCGTAAGTATAGAGAGGATGTGATTGGTAAATTCCAAAGTTCACCTCTCTCCATACTTAGG	AATTCCTAAGTATGGAGAGAGGTGAACTTTGGAATTTACCAATCACATCCTCTCTATACTTACG	no	no		no
mir-1017	GAAAGCUCUACCCAAACUCAUCC	CTAGCGTGAGTTTAGTGGAGTTTAAAGCTTCCCATCGCCAGCAATTAACGCGAAAGCTCTACCCAAACTCATCCCCCG	AATTCGGGGGATGAGTTTGGGTAGAGCTTTCGCGTAATTGCTGGCGATGGGAAGCTTTAAACTCCACTAAACTCACG	no	no		no
mir-2279	UUUCACGCGAAGAUAUUUAUUU	CTAGCCGGGAGAGGATTATGAAAGACAATTTGAAATTAAATATCTGTGTGTGAAATTATTTAAAAGATTAATTTCACGCGAAGATATTTATTTTTACATTTGTCCCTATAATAACCGGG	AATTCCCGGTTATTATAGGGACAAATGTAAAAATAAATATCTTCGCGTGAAATTAATCTTTTAAATAATTTCACACACAGATATTTAATTTCAAATTGTCTTTCATAATCCTCTCCCGG	no	no		no
mir-2280	UCUUAGCUUGGCAAUAAAAUAU	CTAGCTCGTTTAAGATGCTGTGAATATCCCGTTTTCTTAGCTTGGCAATAAAATATTATTCACAGAAACTAGTAATTTACTTCCAAGCTAACTGAAGGGGATATTCAGTGCAACCACGGAG	AATTCTCCGTGGTTGCACTGAATATCCCCTTCAGTTAGCTTGGAAGTAAATTACTAGTTTCTGTGAATAATATTTTATTGCCAAGCTAAGAAAACGGGATATTCACAGCATCTTAAACGAG	no	no		no
mir-2281	UAUCUGUAUCUGCAGUAUUGC	CTAGCGGATGTCGAGCAGTACACGTATTATCTGCAGCTGCAGATGCAAATGTATATGTATCTGTATCTGTATCTGCAGTATTGCAGTATCGCTGCTTTATTCATATCCG	AATTCGGATATGAATAAAGCAGCGATACTGCAATACTGCAGATACAGATACAGATACATATACATTTGCATCTGCAGCTGCAGATAATACGTGTACTGCTCGACATCCG	no	no		no
mir-2282	AUCGGUGAGCUAAAAAUAGAAU	CTAGCGCCTGCATAACGCTGTGGCTTTCCGCTTCTATTTTTCGTTCACTGCCTTGTGCTTCGTTGGAAAATCGGTGAGCTAAAAATAGAATTCGGTTGCCACGCTTCAAGGGG	AATTCCCCTTGAAGCGTGGCAACCGAATTCTATTTTTAGCTCACCGATTTTCCAACGAAGCACAAGGCAGTGAACGAAAAATAGAAGCGGAAAGCCACAGCGTTATGCAGGCG	no	no		no
mir-2283	GAAAAUAUCAUGAAUACGACAAU	CTAGCAGCTGCTCCGAAAATATCATGAATACGACAATTATGTGCACATCATTTAGTATACGTGATATTTTAGGAGCAGCTAG	AATTCTAGCTGCTCCTAAAATATCACGTATACTAAATGATGTGCACATAATTGTCGTATTCATGATATTTTCGGAGCAGCTG	no	no		no
mir-2489	UAUUGUAUGUUGUAUUUGCAGU	CTAGCGCAATAAGTTAGACGTGAGTATGGCTATACAAATCATCTGGAACGTAAGTTCTAATGTATGTATTGTATGTTGTATTTGCAGTTTTATGATAGCAG	AATTCTGCTATCATAAAACTGCAAATACAACATACAATACATACATTAGAACTTACGTTCCAGATGATTTGTATAGCCATACTCACGTCTAACTTATTGCG	no	no		no
mir-2490	UGAAGCGAUAAAGCAGGUUGCAA	CTAGCGAGCGAGTTGAAGCGATAAAGCAGGTTGCAAACTGCTCTCTCGCTTTGCTCTTACTTTATCGCTTAAACTCGCAAG	AATTCTTGCGAGTTTAAGCGATAAAGTAAGAGCAAAGCGAGAGAGCAGTTTGCAACCTGCTTTATCGCTTCAACTCGCTCG	no	no		no
mir-2491	CGCUGUUGCCUUUGCAGUUGCU	CTAGCCGCGAACCACTTTGTGCCGCTGTTGCCTTTGCAGTTGCTGTTTTCCATGTTGCTACTGCGGCCAATTGTTGCGCATCAGCAACATCAACAAC	AATTCTCGAAAGTGAATCACGAGTGCTGCTACTGCAGTTGCTGCTGCTGTTGTTGATGTTGTTGATGTTGCTGATGCGCAACAATTGGCCGCAGTA		no		no
mir-2492	AUGUUUUGUCGAGAGCUUUCAAA	CTAGCGAATTTTTTTGGGATCTCTTTATAAAGCGTTTATTATTTATTTATTATGTTTTGTCGAGAGCTTTCAAAAAATTCAG	AATTCTGAATTTTTTGAAAGCTCTCGACAAAACATAATAAATAAATAATAAACGCTTTATAAAGAGATCCCAAAAAAATTCG	no	no		no
mir-2493	CCGUGUGUAUUUGUGCGAGGCGU	CTAGCCGCTATTATTAAAACCCCCAACGCTCACACACACACACAGCCATGTGCATGGAGCAAAAAACTATGGCCGTGTGTATTTGTGCGAGGCGTTGGCGTTCTGACCAGCG	AATTCGCTGGTCAGAACGCCAACGCCTCGCACAAATACACACGGCCATAGTTTTTTGCTCCATGCACATGGCTGTGTGTGTGTGTGAGCGTTGGGGGTTTTAATAATAGCGG	no	no		no
mir-2494	UUCCCAGUAAUGUCCACUUACAAG	CTAGCTCCATCTTCCGACCGGCGATCAGTAAGTGCACCAGATTGGGAATAACCTTCAAAAGCTGCAACTTAAATATTCCCAGTAATGTCCACTTACAAGGAGCCCCTGGTTGGATGGGTGGAG	AATTCTCCACCCATCCAACCAGGGGCTCCTTGTAAGTGGACATTACTGGGAATATTTAAGTTGCAGCTTTTGAAGGTTATTCCCAATCTGGTGCACTTACTGATCGCCGGTCGGAAGATGGAG	no	no		no
mir-2495	UGGCACUUCAAUUGGGCUGACU	CTAGCTGTATGATCACATTGGCTTGTGGGCGTGGCACTTCAATTGGGCTGACTTTGCCTGGCTGGAAAAGCGGCACCTAATTGAAATGCCCGCCGATCAGTGCTCGATTACGATCGACACG	AATTCGTGTCGATCGTAATCGAGCACTGATCGGCGGGCATTTCAATTAGGTGCCGCTTTTCCAGCCAGGCAAAGTCAGCCCAATTGAAGTGCCACGCCCACAAGCCAATGTGATCATACAG	no	no		no
mir-2496	GCGGGGCACUCACACACGCAUA	CTAGCGTGCGCCGGTGTGCGTGTGTGAGAGGCCATCGTAAAAGCCTTGTTTGCGTGCGGAATTTAACTGTTTTCTCGCCGTCTGCGAATTGCGGGGCACTCACACACGCATATTCAGCCGCACG	AATTCGTGCGGCTGAATATGCGTGTGTGAGTGCCCCGCAATTCGCAGACGGCGAGAAAACAGTTAAATTCCGCACGCAAACAAGGCTTTTACGATGGCCTCTCACACACGCACACCGGCGCACG	no	no		no
mir-2497	ACAACAUUUACAAUGUUUGCAG	CTAGCGCACGTCATCGTAAGCATTGCAAAATGTAGTTGTTAAATTCGCTCTTCAATCATTAACAACATTTACAATGTTTGCAGGCTGTCAACGTTGATGGCG	AATTCGCCATCAACGTTGACAGCCTGCAAACATTGTAAATGTTGTTAATGATTGAAGAGCGAATTTAACAACTACATTTTGCAATGCTTACGATGACGTGCG	no	no		no
mir-2498	AAACUGGCAUUCCCGUCUUACUU	CTAGCCACATTTGCCATAATCTCCTTAAAATAGTAAAGGCTGTTATGCTTATTTTTGTGTTTTTTACAAAACTGGCATTCCCGTCTTACTTATTTTCAGAAAACTTACACCAAAGTGG	AATTCCACTTTGGTGTAAGTTTTCTGAAAATAAGTAAGACGGGAATGCCAGTTTTGTAAAAAACACAAAAATAAGCATAACAGCCTTTACTATTTTAAGGAGATTATGGCAAATGTGG	no	no		no
mir-2499	AUGCGGAUGACAUUCACGUCCGUA	CTAGCTCCTTGCTGTGGGTGTGGTTGCGTGCGTAGACGTCAGCGCAATGCCTTTGTTTGGCGGCATGCGGATGACATTCACGTCCGTATCCGCACACACATG	AATTCATGTGTGTGCGGATACGGACGTGAATGTCATCCGCATGCCGCCAAACAAAGGCATTGCGCTGACGTCTACGCACGCAACCACACCCACAGCAAGGAG	no	no		no
mir-2500	GGAUUUUGUGUGUGGACCUCAG	CTAGCGTAAGGAACACACATATACAATACCGTTTGAATTTCAAATAATCAGGATTTTGTGTGTGGACCTCAGAG	AATTCTCTGAGGTCCACACACAAAATCCTGATTATTTGAAATTCAAACGGTATTGTATATGTGTGTTCCTTACG	no	no		no
mir-2501	GUAAGUUUGGAGUGCCUGGGCUAA	CTAGCGTAAGTTTGGAGTGCCTGGGCTAAGAACTTCCATTCTGAAACTTAACTCTTGCAATCAAACTTTCTTTCAGG	AATTCCTGAAAGAAAGTTTGATTGCAAGAGTTAAGTTTCAGAATGGAAGTTCTTAGCCCAGGCACTCCAAACTTACG	no	no		no
mir-3642	GAAACGUUCACUCUGCUCUUCU	CTAGCGTGAGTGGGTCGCACGGAGCGTCATTTGGAATTCCCATGGCTGACGAAACGTTCACTCTGCTCTTCTCGATTACAGG	AATTCCTGTAATCGAGAAGAGCAGAGTGAACGTTTCGTCAGCCATGGGAATTCCAAATGACGCTCCGTGCGACCCACTCACG	no	no		no
mir-3643	UCAUACUUAUUUAUGCUCCUUU	CTAGCGTGAGTTTATCTAAATATGCCCATTTATCAATAGTCATACTTATTTATGCTCCTTTAACTCCTTGCAGG	AATTCCTGCAAGGAGTTAAAGGAGCATAAATAAGTATGACTATTGATAAATGGGCATATTTAGATAAACTCACG	no	no		no
mir-3644	GUGAGUGAUUAUGGUUUAAGUA	CTAGCGTGAGTGATTATGGTTTAAGTAATACGAATTACATAAACTATATTTAACCACTATTCTTAGG	AATTCCTAAGAATAGTGGTTAAATATAGTTTATGTAATTCGTATTACTTAAACCATAATCACTCACG	no	no		no
mir-3645	GUGAGUGCAGGCUGUUUAUUG	CTAGCGTGAGTGCAGGCTGTTTATTGCGGCGCTGTTTACTGTTTACGATCGCACTGGAAGTGCGCTTTCCGGCGCCTTTGGAAGCCAGCACTCAA	AATTCCTGCGGGGAGAGAGAGAGGGGAAAGAAAGGAAAACAATGAAGGAAACTTGAGTGCTGGCTTCCAAAGGCGCCGGAAAGCGCACTTCCAG	no	no		no
mir-4951	UCGGGUGAGGUUUCUGAUGCU	CTAGCTTTTCGTACGTACAAAAAAGCATCAGGTTTTCGGGTGAGGTTTCTGATGCTTTGTCTCTTAAGTTTTTCCTAACAATTAAACCCTATGTCGGTA	AATTCTTTTTATCTCTCTGGTCATACATTTGGTGGGTGAGGTTTTTTGATGGTATTCGTAATACCGACATAGGGTTTAATTGTTAGGAAAAACTTAAGAG	no	no		no
mir-4966	UGUUCAACAUAUUUAGCACUCA	CTAGCGCTGTGTGACAACAAACTTGTCGGCACTGGAGTACTAAATATATTGCACATGTTCATGCATGTTCAACATATTTA	AATTCTGATGTTCGTGTTATTTTTCGTTTCGTTGTTCATTTTTCGGTACTTGAGTGCTAAATATGTTGAACATGCATGAACATG	no	no		no
mir-4968	UAGCUGCCACGGUUUGUUGCUU	CTAGCTTTTCCTCAGAGCCGCGACTGCTGGCGTGTTATTGTTGCTGTTGCAGCTAGCTGCCACGGTTTGTTGCTTCACTGATTACGCGCAATGCAG	AATTCGAACTCTCAGCTGCTATTGCTCCTCTGCAGTTAGTTGCTGTTGCTTCTGCTGCTGCTGCTGTTGCTGCATTGCGCGTAATCAGTGAAGCA	no	no		no
mir-4969	CGGUAAAUUGAAUGAUGAGUGGGA	CTAGCGTATGGATTTTTCGGCGTGGCGGTAAATTGAATGATGAGTGGGAGGATGTCGCTGCCATTGTTTGGTTGATAAGGGAGCCTGGCGCACTATTAC	AATTCATGATGATGTCGCATCGGCGGGGTGGTATTGATTGACAGGTGGGCTCTCGTTTCAGAGAGCCAGGTAATAGTGCGCCAGGCTCCCTTATCAA	no	no		no
mir-4976	UCCAGGCUGUCGUCCAUGGAGU	CTAGCGTCGATGCCGGCGTTTCCCGCTCCAGGCTGTCGTCCATGGAGTTTGTGTTGTCAGCATTCAGCTCGGTGGATGTCAGCCAGCGGTGGAAGGCGTCGTCTCGCTG	AATTCAGCGAGACGACGCCTTCCACCGCTGGCTGACATCCACCGAGCTGAATGCTGACAACACAAACTCCATGGACGACAGCCTGGAGCGGGAAACGCCGGCATCGACG	no	no		no
miR-997-fw	AAAGCUAGCUUAUGGAUCCUCUUUCAAUG
miR-997-rv	AAAGAAUUCUGCCGAUCCAAGCAUCCAAUG
